# Supplementary material for: Connexin 43 plays a role in proliferation and migration of pulmonary arterial fibroblasts in response to hypoxia
Source: PubMed Central journal article supplement (PMC7338651; doi:10.1177/2045894020937134), 2020-07-06
Supplement: sj-pdf-1-pul-10.1177_2045894020937134.pdf [file sj-pdf-1-pul-10.1177_2045894020937134.pdf]

**Connexin 43 plays a role in the remodelling processes observed in both *in vitro* and *in vivo* experimental model of pulmonary hypertension**

**Supplementary Figures**

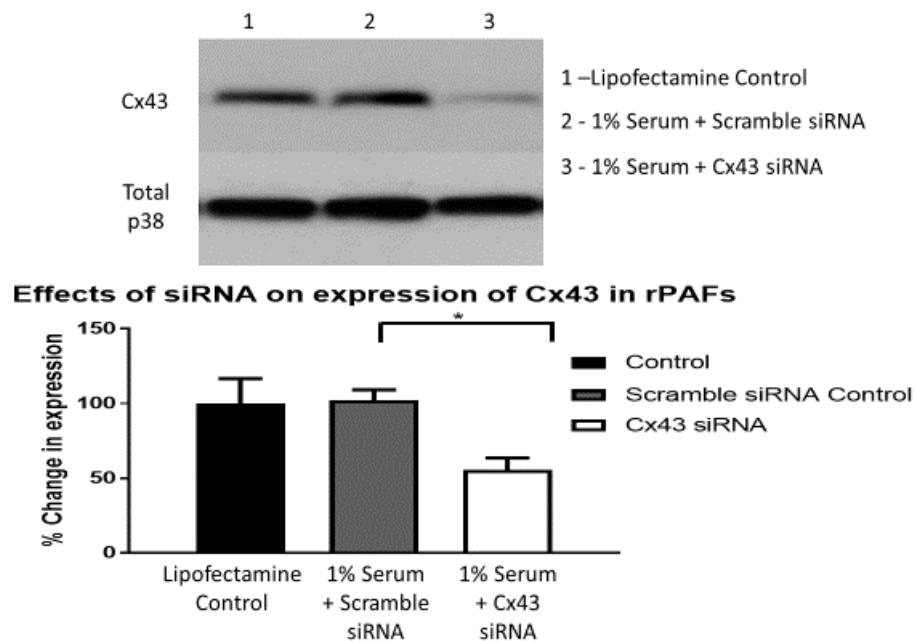

**Supplemental figure 1 Effects of Cx43 siRNA on protein expression of Cx43 in rPAFs.** Cx43 siRNA caused a significant decrease in Cx43 protein expression compared to scrambled siRNA and Lipofectamine only controls. Data expressed as mean  $\pm$  sem and were analysed one way ANOVA followed by Bonferroni's post-hoc test. n =4

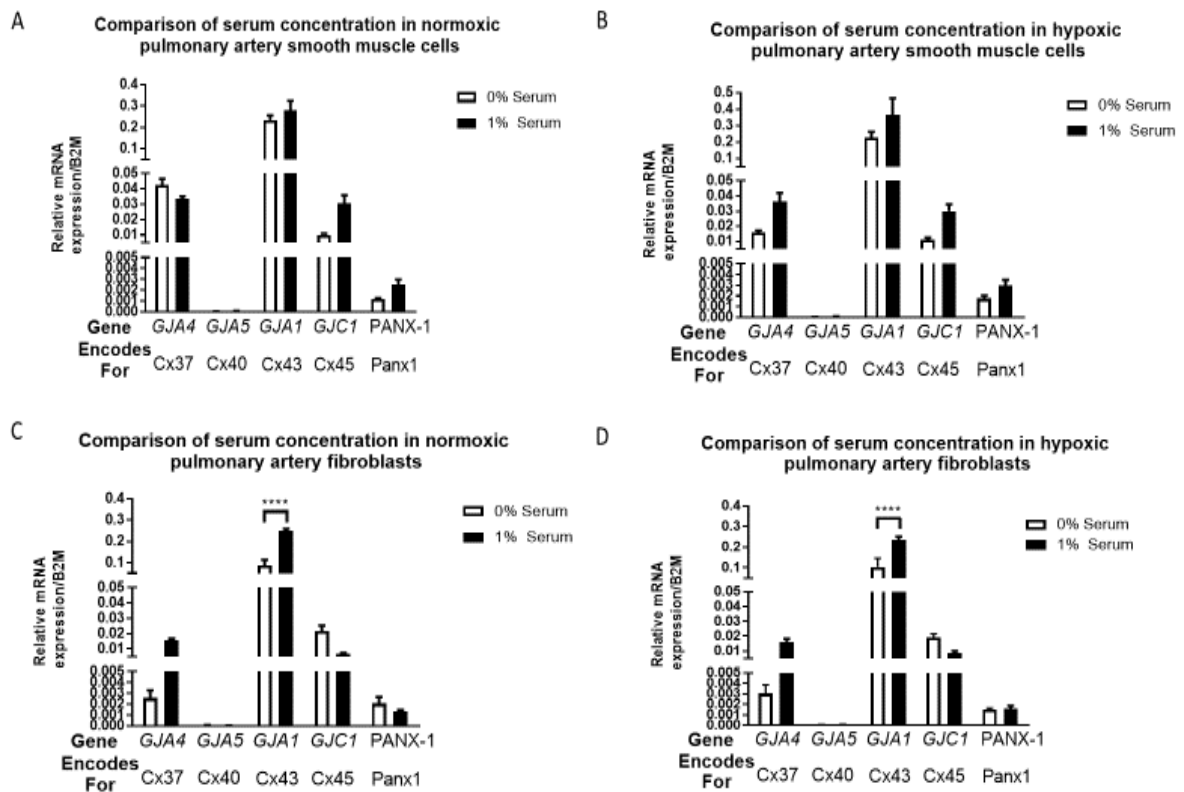

**Supplemental figure 2. Effects of serum on connexin and pannexin gene expression in normoxic and hypoxic rPASCs and rPAFs.** Serum had no effect on expression of the genes *GJA4*, *GJA5*, *GJA1*, *GC1* or *PANX-1* in rPASCs under either normoxic or hypoxic conditions. *GJA1* expression was increased by serum in rPAFs under both normoxic and hypoxic conditions. Expression of *GJA4*, *GJA5*, *GC1* or *PANX-1* were unaffected by serum in rPAFs under either normoxic or hypoxic conditions. Data expressed as mean  $\pm$  sem and were analysed one way ANOVA followed by Bonferroni's post-hoc test. n =6

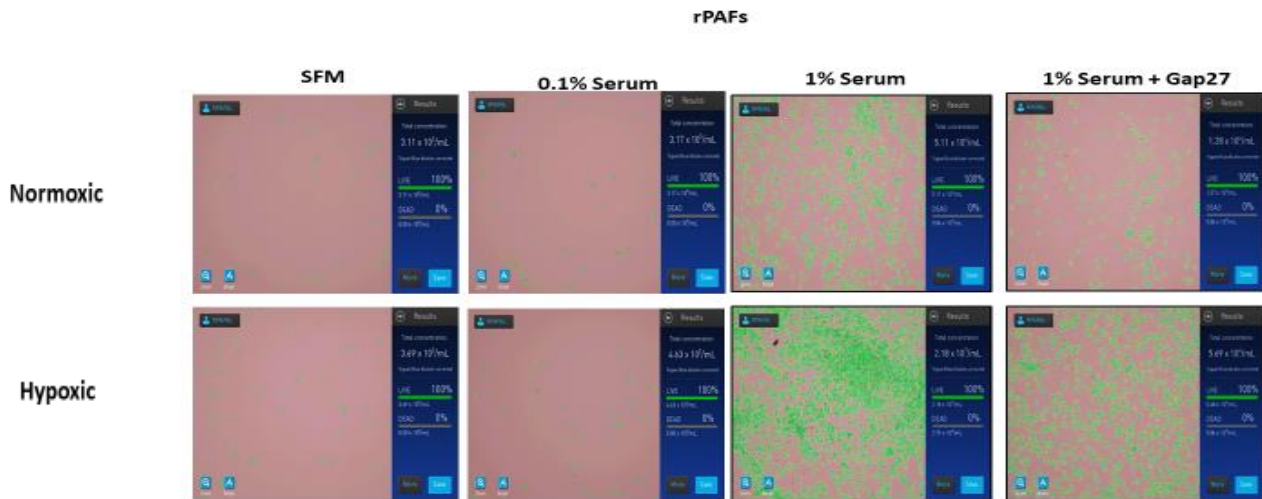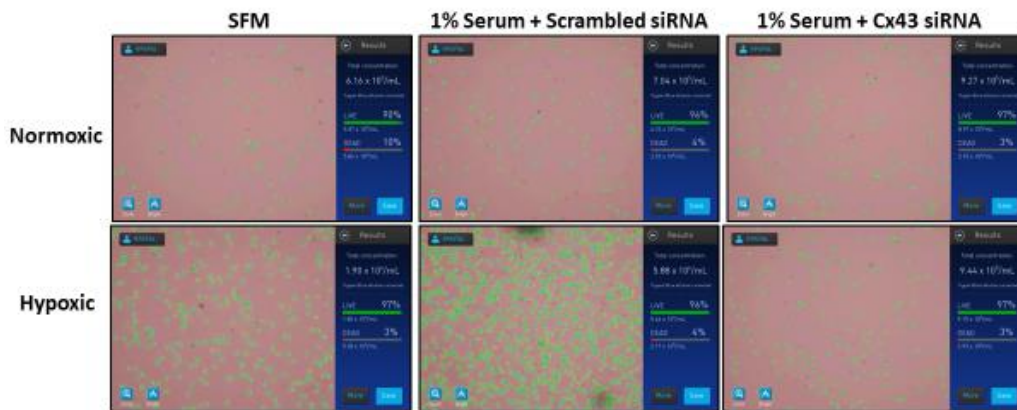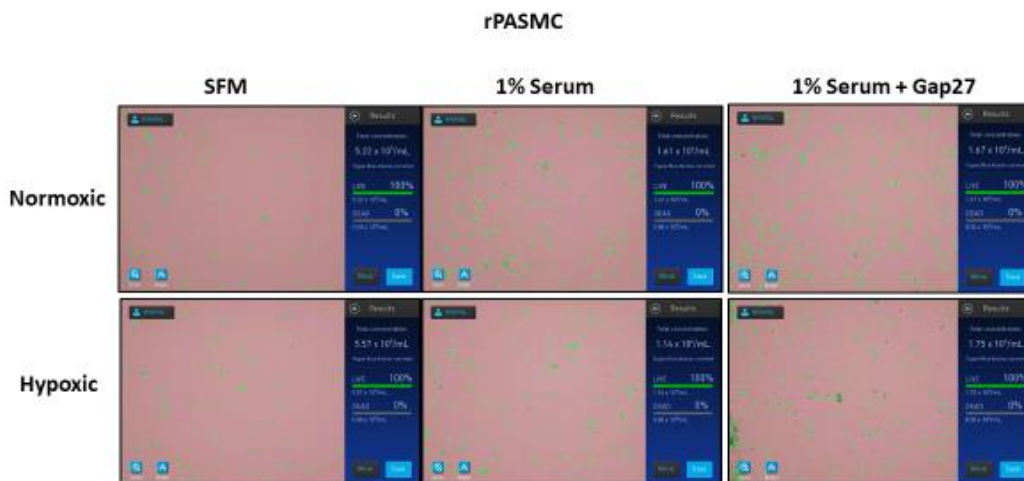

**Supplemental figure 3 Cell Proliferation images captured by the automated cell counter Countess II (Life Technologies, United Kingdom). Hypoxia increased cell proliferation in rPAFs (A and B) but not rPASCs (C). Hypoxic-induced proliferation of rPAFs was inhibited by Gap27 (A) and Cx43 siRNA (B). n=8-12**

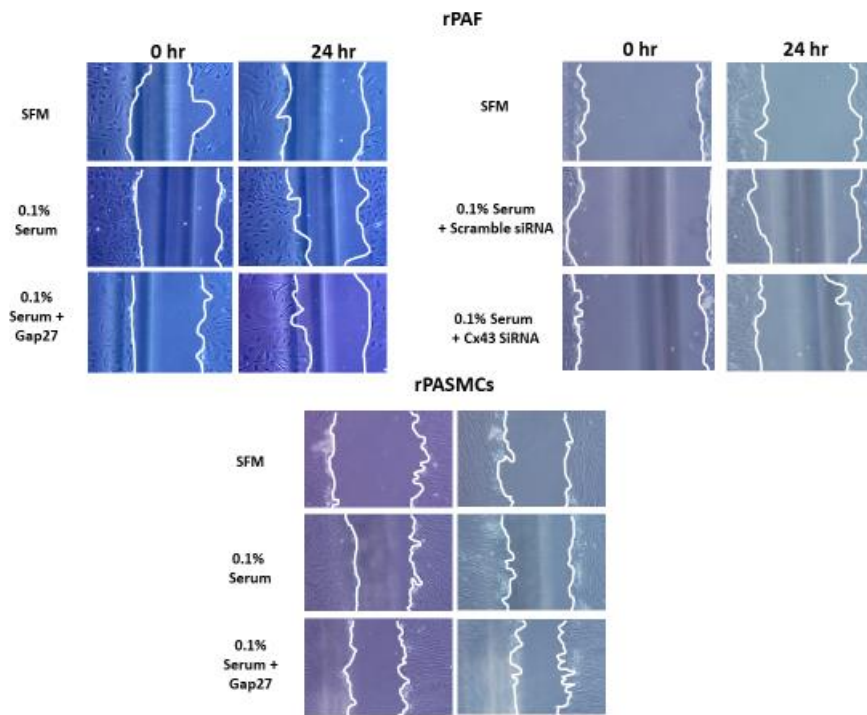

**Supplemental figure 4. Effects of Cx43 inhibition on migration of rPAFs and rPASCs under normoxic conditions.** There were no changes in migration of rPAFs or rPASCs under normoxic conditions. Data expressed as mean  $\pm$  SEM followed two-way ANOVA followed by tukey's post-hoc test. n=4-6

## Supplementary Methods

### RNA Analysis

Protocol described in full in the main manuscript. The primer sequences used for the qRT-PCR are shown in the table below

| <b>Primer Name</b> | <b>Sequence</b>                                                                   |
|--------------------|-----------------------------------------------------------------------------------|
| Rat Connexin 37    | Forward Primer - CCCATCTCCCACATCCGATAC<br>Reverse Primer - TCCCTCTTTCTGCCGCAAC    |
| Rat Connexin 40    | Forward Primer - GCAGGACAGAAGCGGTCTC<br>Reverse Primer - GATTAATGAGCAACACCATCCAGA |
| Rat Connexin 43    | Forward Primer - GAAGCACCATCTCCAACCTCG<br>Reverse Primer - TTCATGTCCAGCAGCAACTTT  |
| Rat Connexin 45    | Forward Primer - ACCAATTCCACCACCATGAGT<br>Reverse Primer - TCAGCACAGTGAGCCAGATC   |
| Rat Pannexin 1     | Forward Primer - ACCTCTGCTCCGACCTGAA<br>Reverse Primer - CACATTCTCAGAGTCACTCCTGGA |

**Table 1 – Primer sequences for qPCR**
